# Supplementary material for: Regioisomeric N–C functionalization of an asymmetric N-rich framework: a promising pathway to heat-resistant energetic materials
Source: Royal Society of Chemistry journal article supplement (doi:10.1039/d3ce00647f), 2023-01-01
Supplement: d3ce00647f1.pdf [file d3ce00647f1.pdf]

## Supporting Information (SI)

### **Regioisomeric N-C functionalization of asymmetric N-rich framework: A promising pathway to heat-resistant energetic materials**

Dongshuai Su,<sup>ab</sup> Jinxiong Cai,<sup>ab</sup> Ping Yin,<sup>\*ab</sup> and Siping Pang<sup>\*a</sup>

<sup>a</sup> School of Materials Science & Engineering, Beijing Institute of Technology, Beijing 100081, China

<sup>b</sup> Beijing Institute of Technology Chongqing Innovation Center, Chongqing 401120, China

\*Email: [pinyin@bit.edu.cn](mailto:pinyin@bit.edu.cn), [pangsp@bit.edu.cn](mailto:pangsp@bit.edu.cn)

### **Table of Contents**

|                                                                                   |     |
|-----------------------------------------------------------------------------------|-----|
| 1. Experimental Sections.....                                                     | S2  |
| 2. Computational Details.....                                                     | S3  |
| 3. Crystallographic Data for <b>4</b> and <b>5</b> .....                          | S4  |
| 4. Temperature information for some methylated compounds .....                    | S4  |
| 5. <sup>1</sup> H and <sup>13</sup> C NMR spectra for <b>4</b> and <b>5</b> ..... | S8  |
| 6. IR spectra of <b>4</b> .....                                                   | S10 |
| 7. DSC curve of <b>4</b> and <b>5</b> .....                                       | S10 |
| References.....                                                                   | S11 |

## 1. Experimental Sections

### 1.1 Safety Precaution

In this work, all new compounds are potential energetic materials that tend to explode under certain external stimuli. Therefore, the whole experimental process should be carried out by using proper safety equipment, such as safety shields, eye protection, and leather gloves.

### 1.2 General methods

$^1\text{H}$  NMR and  $^{13}\text{C}$  NMR spectra were recorded at 25 °C on a Bruker 400 MHz and 125 MHz, respectively, and TMS as internal standard. Chemical shifts were reported in parts per million (ppm). The onset decomposition temperature was measured using a TA Instruments DSC25 differential scanning calorimeter at a heating rate of 5 °C min<sup>-1</sup> under dry nitrogen atmosphere. Infrared spectra (IR) were obtained on a PerkinElmer Spectrum BX FT-IR instrument equipped with an ATR unit at 25 °C. Elemental analyses of C/H/N were investigated on a Vario EL III Analyzer. Impact and friction sensitivities were tested by a BAM fallhammer and friction tester. Densities were determined at room temperature by employing a Micromeritics AccuPyc 1340 gas pycnometer. The crystal structures were produced employing Mercury 2021.1.0 software.

### 1.3 Synthetic Procedures

***1-Methyl-3-(1-methyl-3,4-dinitro-1H-pyrazol-5-yl)-5-nitro-1H-1,2,4-triazole (4)***: Compound **3** (0.54 g, 2 mmol) was added to DMF (3 mL), then NaOH (0.16 g, 4 mmol) and CH<sub>3</sub>I (1.135 g, 8mmol) were added respectively. Then the resulted mixture was heated to 60 °C for 0.5 h. The resulting solution was cooled and poured into ice water (20 g). The dilute solution was extracted with ethyl acetate (3×10 mL), dried over anhydrous Na<sub>2</sub>SO<sub>4</sub>, and got pure solid **4** (0.334 g, 56%) by column chromatography. *T<sub>d</sub>* (onset): 337°C.  $^1\text{H}$  NMR (*d*<sub>6</sub>-DMSO):  $\delta$  4.28 (s, 3H), 4.23 (s, 3H) ppm.  $^{13}\text{C}$  NMR (*d*<sub>6</sub>-DMSO):  $\delta$  152.87, 145.59, 144.55, 130.10, 126.29, 41.29, 40.81 ppm. IR (KBr):  $\tilde{\nu}$  1537,

1495, 1432, 1400, 1381, 1355, 1334, 1311, 1296, 1270, 1169, 1149, 1039, 1023, 985, 892, 843, 813, 788, 768, 746, 727, 709, 631, 513, 478, 435  $\text{cm}^{-1}$ . Elemental analysis of  $\text{C}_7\text{H}_6\text{N}_8\text{O}_6$  (298.18): calcd C 28.20, H 2.03, N 37.58%; found: C 29.20, H 2.10, N 37.38%.

**1-Methyl-5-(1-methyl-4,5-dinitro-1H-pyrazol-3-yl)-3-nitro-1H-1,2,4-triazole (5):** It was treated analogously to compound 2b and got solid **5** (0.007 g, <2%) by column chromatography.  $T_d$  (onset): 189°C.  $^1\text{H}$  NMR ( $d_6$ -DMSO):  $\delta$  4.30 (s, 3H), 4.26 (s, 3H) ppm.  $^{13}\text{C}$  NMR ( $d_6$ -DMSO):  $\delta$  153.58, 149.45, 144.75, 130.32, 129.18, 37.43, 33.50 ppm. IR (KBr):  $\tilde{\nu}$   $\text{cm}^{-1}$ .

## 2. Computational Details

Theoretical calculations were performed by using the Gaussian 09 suite of programs<sup>1</sup>. Gas phase heats of formation of the title compounds were computed based on an isodesmic reaction (Scheme S1). The enthalpy of reaction was carried out by combining the M062X/6-311++G\*\* energy difference for the reactions, the scaled zero-point energies (ZPE), values of thermal correction (HT), and other thermal factors. The solid-state heats of formation were further obtained by employing Trouton's rule according to equation 1 (T represents either melting point or decomposition temperature when no melting occurs prior to decomposition)<sup>2</sup>.

$$\Delta H_{sub} = 188/\text{J mol}^{-1} \text{K}^{-1} \times T \quad (1)$$

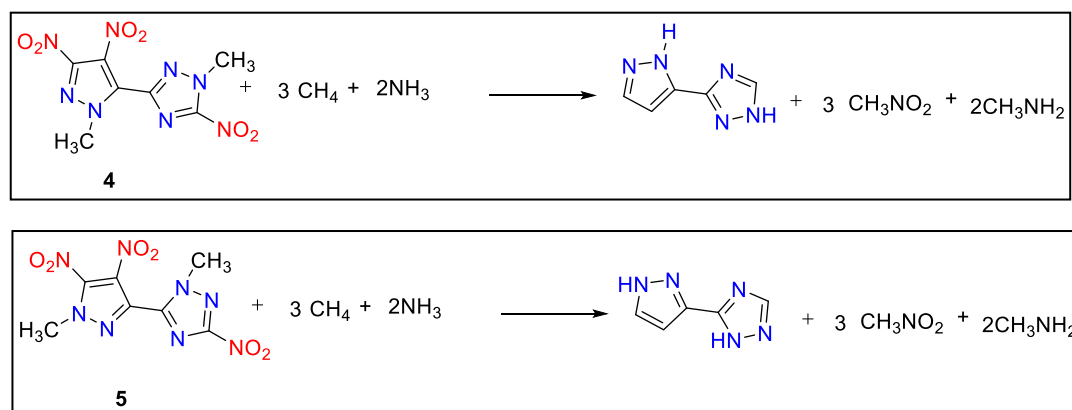

Scheme S1. Isodesmic reactions for **4** and **5**.

## 3. Crystallographic data for **4** and **5**

|                                            | 4                                                           | 5                                                           |
|--------------------------------------------|-------------------------------------------------------------|-------------------------------------------------------------|
| CCDC No.                                   | 2189319                                                     | 2205892                                                     |
| Empirical Formula                          | C <sub>7</sub> H <sub>6</sub> N <sub>8</sub> O <sub>6</sub> | C <sub>7</sub> H <sub>6</sub> N <sub>8</sub> O <sub>6</sub> |
| Formula Weight                             | 298.20                                                      | 298.20                                                      |
| Temperature (K)                            | 296(2)                                                      | 296(2)                                                      |
| Crystal System                             | orthorhombic                                                | monoclinic                                                  |
| Space group                                | <i>P2<sub>1</sub>2<sub>1</sub>2<sub>1</sub></i>             | <i>P2<sub>1</sub>/c</i>                                     |
| Unit cell dimensions                       |                                                             |                                                             |
| a (Å)                                      | 5.2481(12)                                                  | 8.638(10)                                                   |
| b (Å)                                      | 14.898(3)                                                   | 17.10(2)                                                    |
| c (Å)                                      | 15.184(4)                                                   | 8.705(10)                                                   |
| α (°)                                      | 90                                                          | 90                                                          |
| β (°)                                      | 90                                                          | 111.112(14)                                                 |
| γ (°)                                      | 90                                                          | 90                                                          |
| Volume (Å <sup>3</sup> )                   | 1187.2(5)                                                   | 1200(2)                                                     |
| Z                                          | 4                                                           | 4                                                           |
| Density (g cm <sup>-3</sup> ) (calculated) | 1.668                                                       | 1.651                                                       |
| F(000)                                     | 608.0                                                       | 608.0                                                       |
| Crystal size (mm <sup>3</sup> )            | 0.18 x 0.16 x 0.14                                          | 0.19 x 0.18 x 0.1                                           |
| Goodness-of-fit on F <sup>2</sup>          | 0.935                                                       | 1.008                                                       |
| Final R indexes [I>=2σ (I)]                | R <sub>1</sub> = 0.0378, wR <sub>2</sub> =<br>0.1142        | R <sub>1</sub> = 0.0807, wR <sub>2</sub> =<br>0.1976        |
| Final R indexes [all data]                 | R <sub>1</sub> = 0.0466, wR <sub>2</sub> =<br>0.1298        | R <sub>1</sub> = 0.1640, wR <sub>2</sub> =<br>0.2414        |

#### 4. Temperature information for some methylated compounds

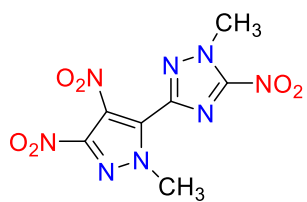

4

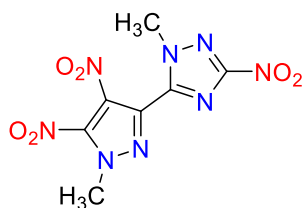

5

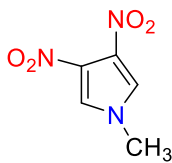

1

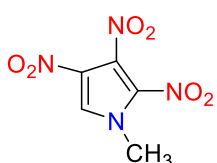

2

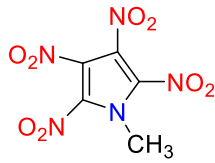

3

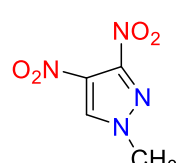

MDNP

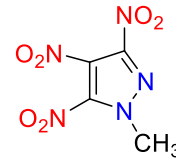

MTNP

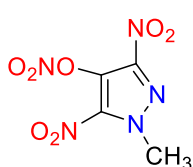

MDNPN

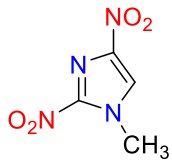

2,4-MDNI

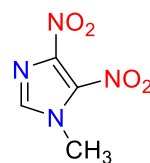

4,5-MDNI

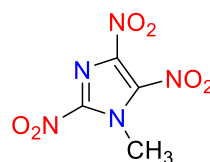

MTNI

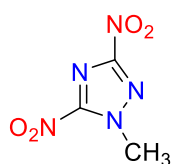

MDNT

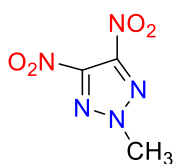

4

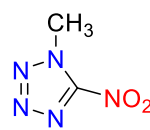

5

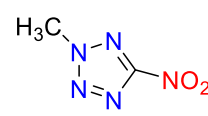

6

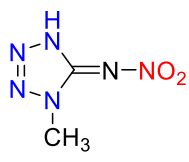

7

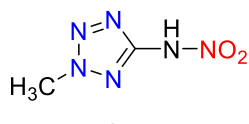

8

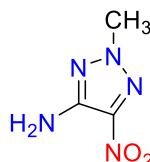

9

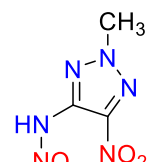

10

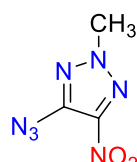

11

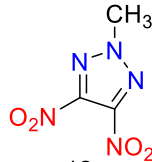

12

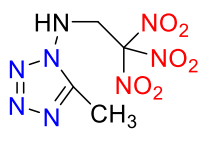

13

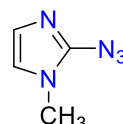

14

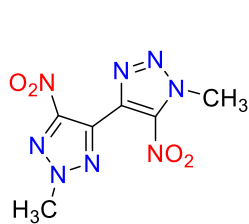

15

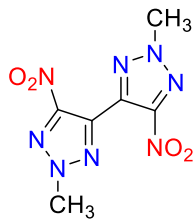

16

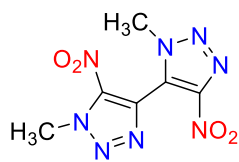

17

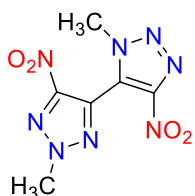

18

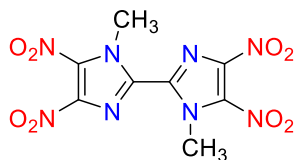

19

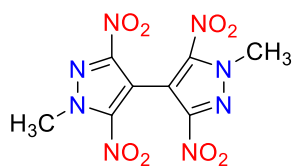

20

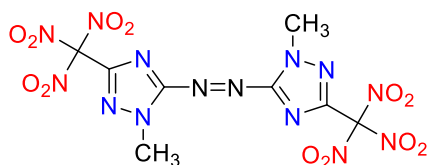

21

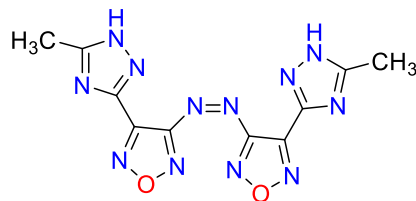

22

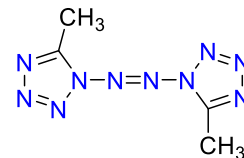

23

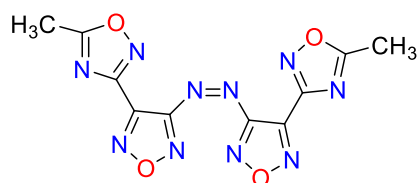

24

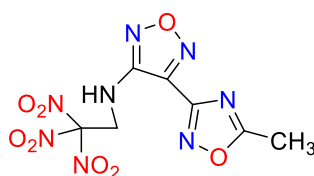

25

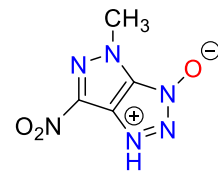

26

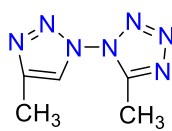

27

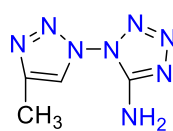

28

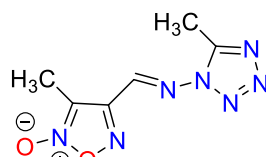

29

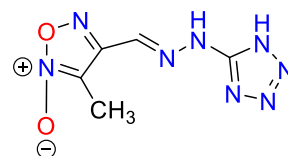

30

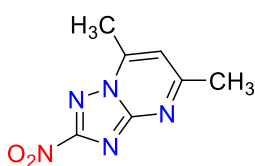

31

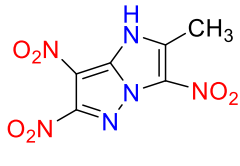

32

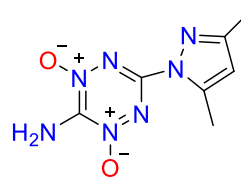

33

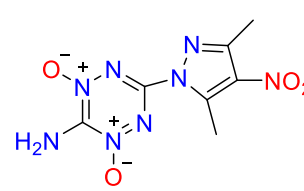

34

| Compound   | T <sub>d</sub> , °C | T <sub>m</sub> , °C |
|------------|---------------------|---------------------|
| <b>4</b>   | 337                 | -                   |
| <b>5</b>   | 189                 | -                   |
| 1          | -                   | 100                 |
| 2          | -                   | 115                 |
| 3          | 196                 | 100                 |
| MDNP       | 298                 | -                   |
| MTNP       | 285                 | -                   |
| MDNPN      | 200                 | -                   |
| 2,4-MDNI   | 323                 | -                   |
| 4,5-MDNI   | -                   | 77                  |
| MTNI       | 309                 | 82                  |
| MDNT       | 230                 | -                   |
| 4          | 169                 | -                   |
| 5          | 155                 | 45                  |
| 6          | 150                 | 75                  |
| 7          | 125                 | -                   |
| 8          | 122                 | -                   |
| 9          | -                   | 169                 |
| 10         | 112                 | -                   |
| 11         | -                   | 124                 |
| 12         | -                   | 79                  |
| 13         | 137                 | -                   |
| 14         | 95                  | -                   |
| 15         | 229                 | 139                 |
| 16         | 227                 | 165                 |
| 17         | 237                 | 165                 |
| 18         | 275                 | 160                 |
| 19         | 258                 | 236                 |
| 20         | -                   | 193                 |
| 21         | 165                 | -                   |
| 22(DMnAzF) | 327                 | -                   |
| 23         | 127.2               | -                   |
| 24(DMAzF)  | 271                 | -                   |
| 25         | 200                 | -                   |
| 26         | 101                 | -                   |
| 27         | 169                 | 77                  |
| 28         | 150                 | 75                  |
| 29         | 198                 | 141                 |
| 30         | 191                 | -                   |
| 31         | 269                 | 184                 |
| 32         | 239.2               | -                   |
| 33         | 252                 | -                   |

## 5. $^1\text{H}$ and $^{13}\text{C}$ NMR spectra for **4**

CJX-122-1.10.1.1r

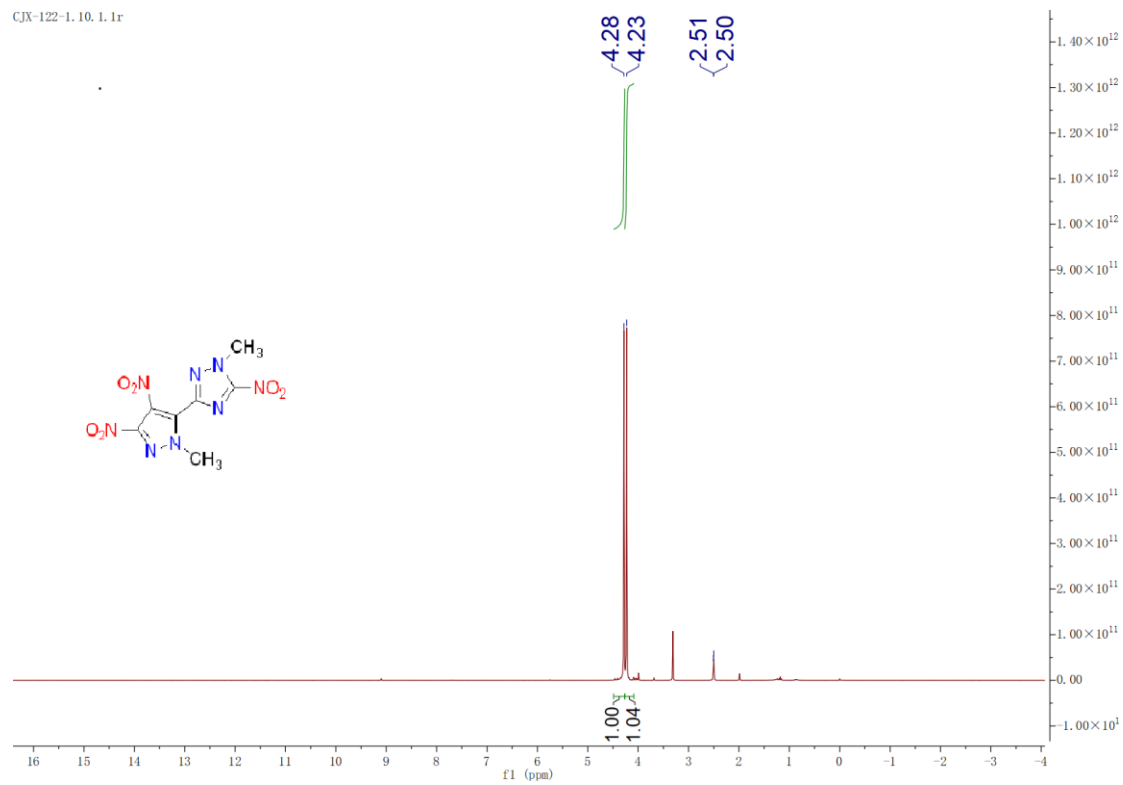

$^1\text{H}$  NMR spectrum of **4** in  $d_6$ -DMSO.



CJX-122-1.11.1.1r

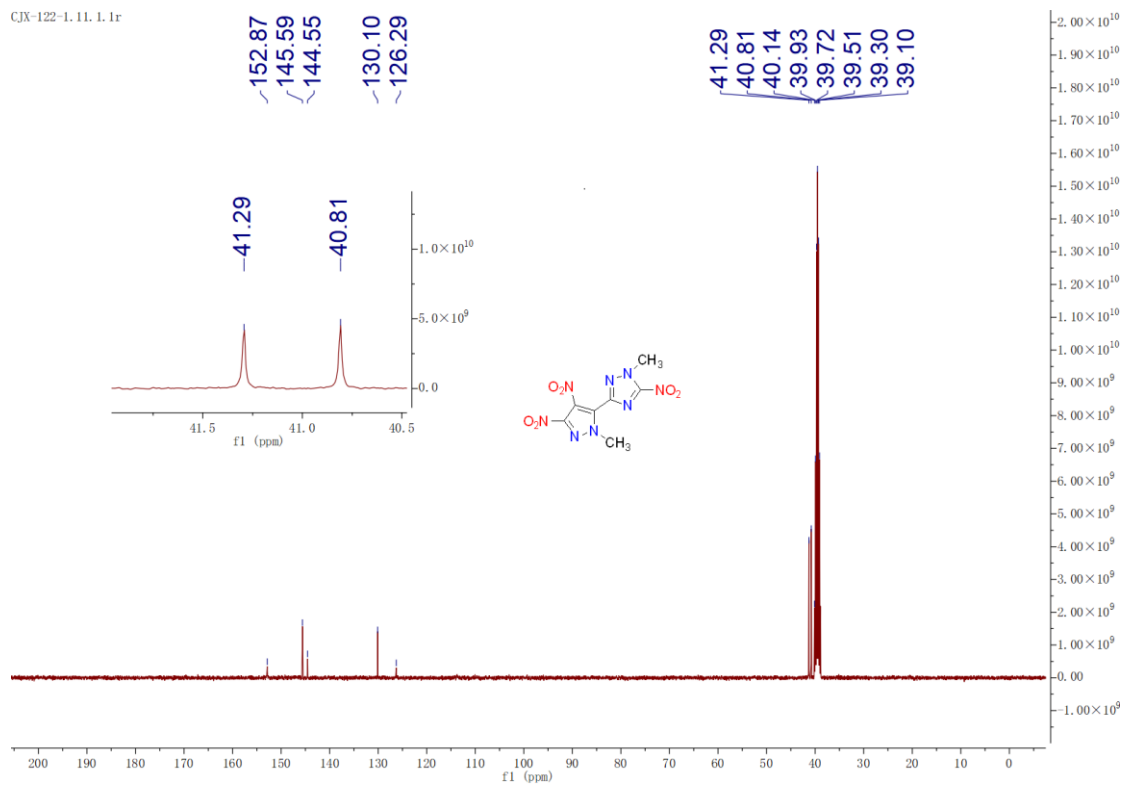

<sup>13</sup>C NMR spectrum of **4** in *d*<sub>6</sub>-DMSO.

2022.09.01-SPS-ME (2) . 10. 1. 1r

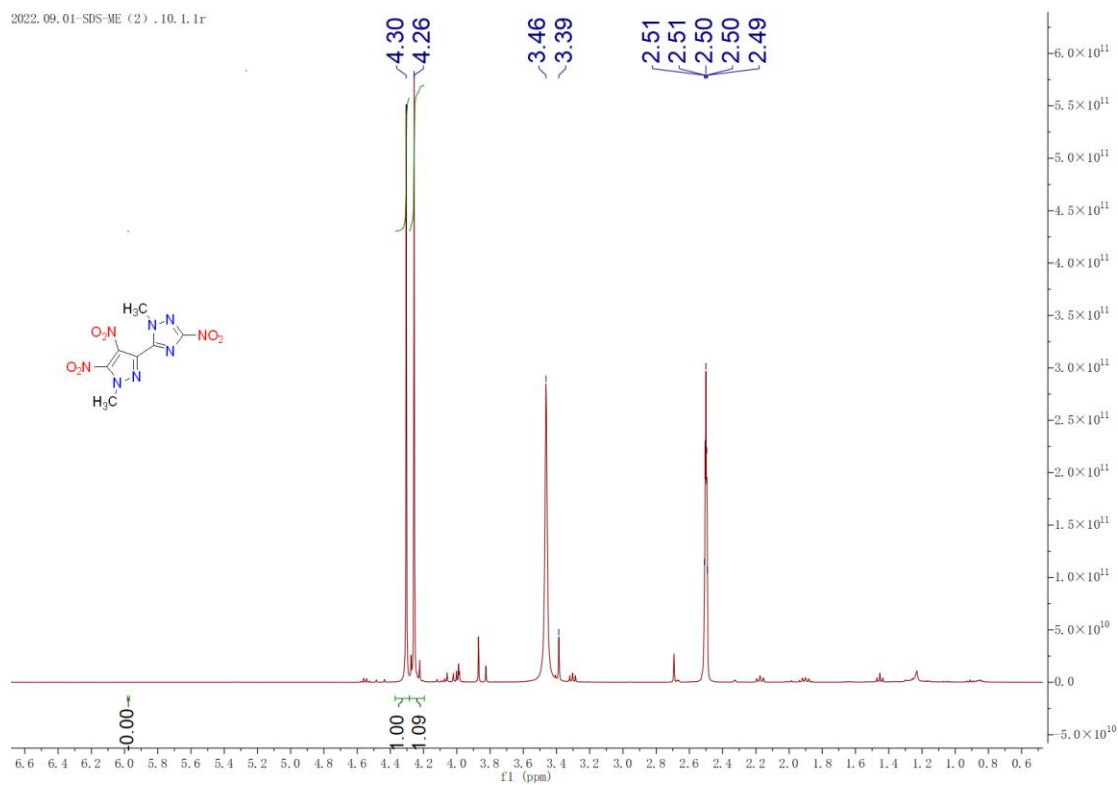

<sup>1</sup>H NMR spectrum of **5** in *d*<sub>6</sub>-DMSO.

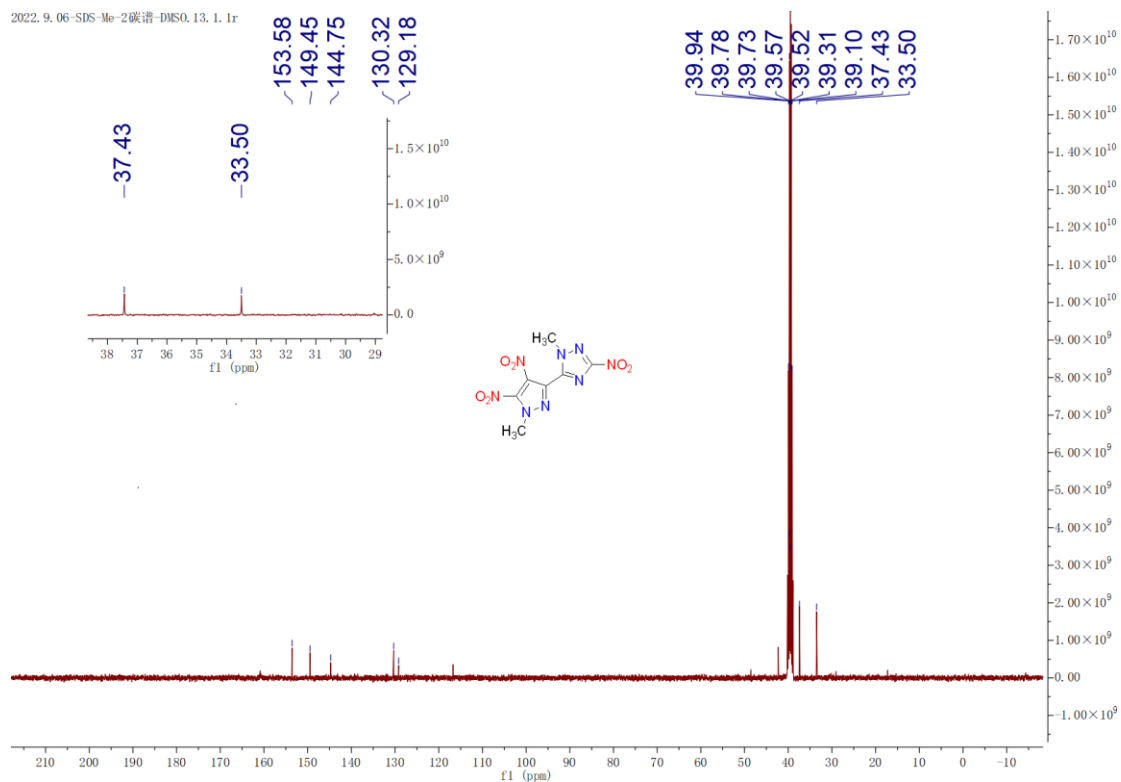

<sup>13</sup>C NMR spectrum of **5** in *d*<sub>6</sub>-DMSO.

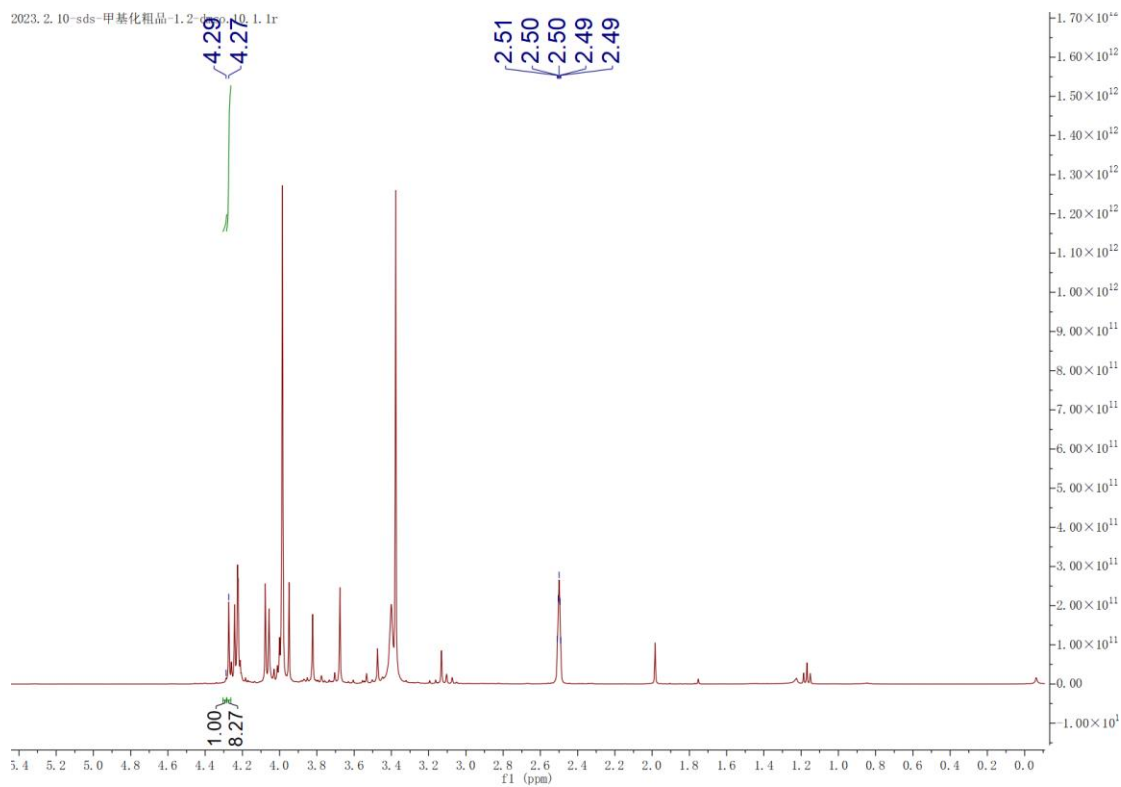

<sup>1</sup>H NMR spectrum of crude compounds of **4** and **5** in *d*<sub>6</sub>-DMSO.

## 6. IR spectra of 4

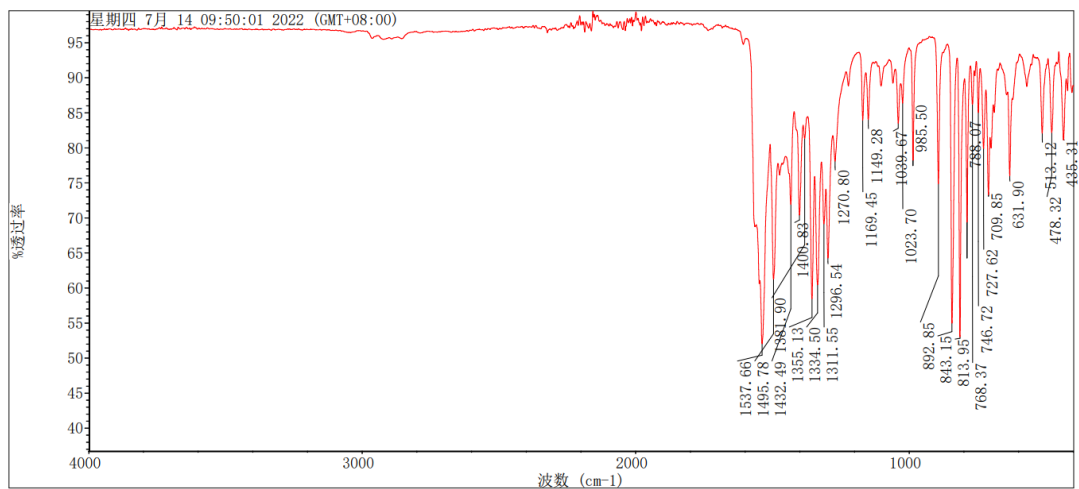

IR spectrum of compound 4

## 7. DSC curve of 4 and 5

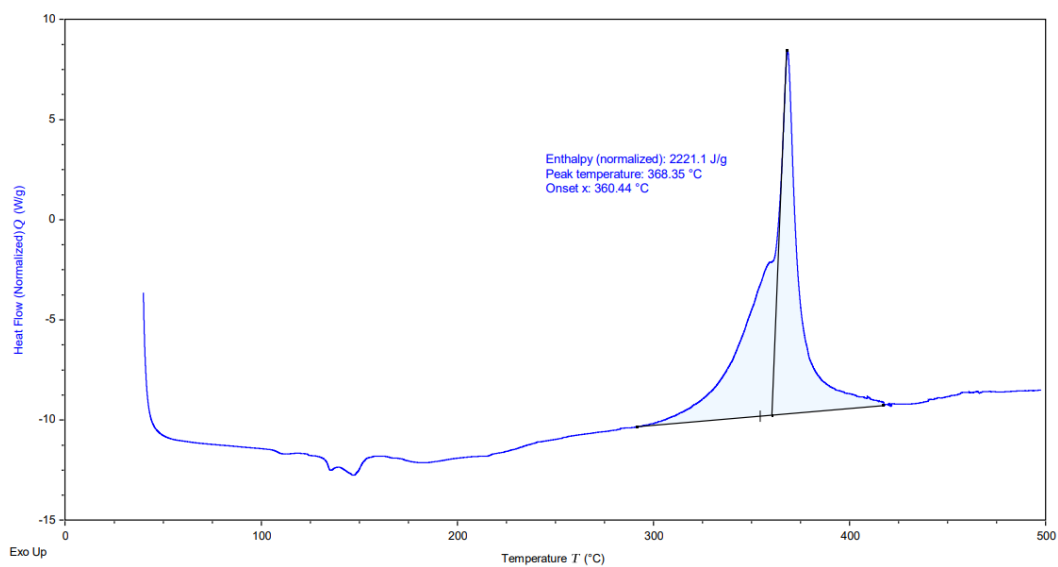

DSC curve of compound 4 at 5 °C min<sup>-1</sup>

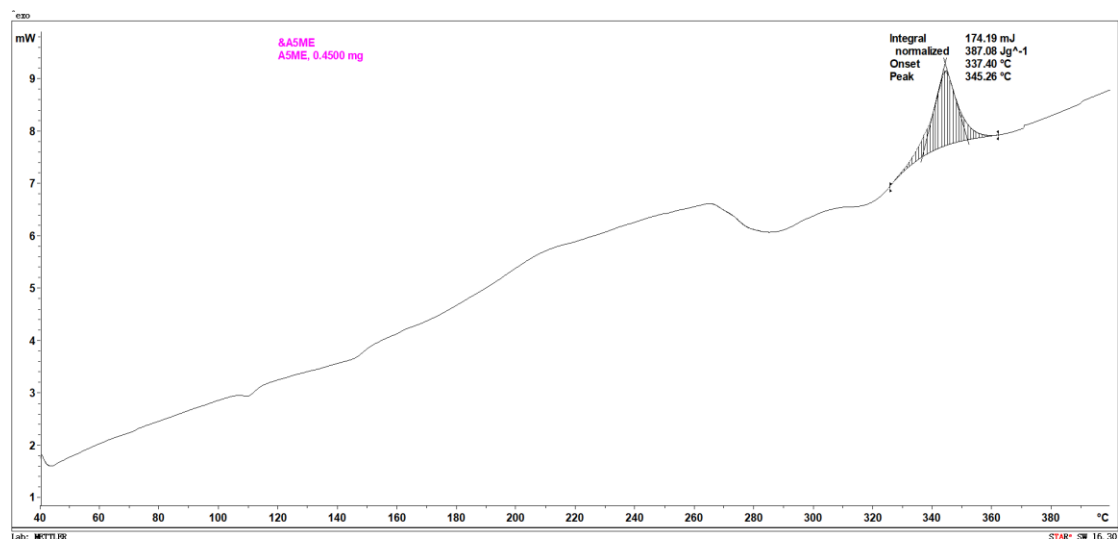

High-pressure DSC curve of compound **4** in air at 5 °C min<sup>-1</sup>

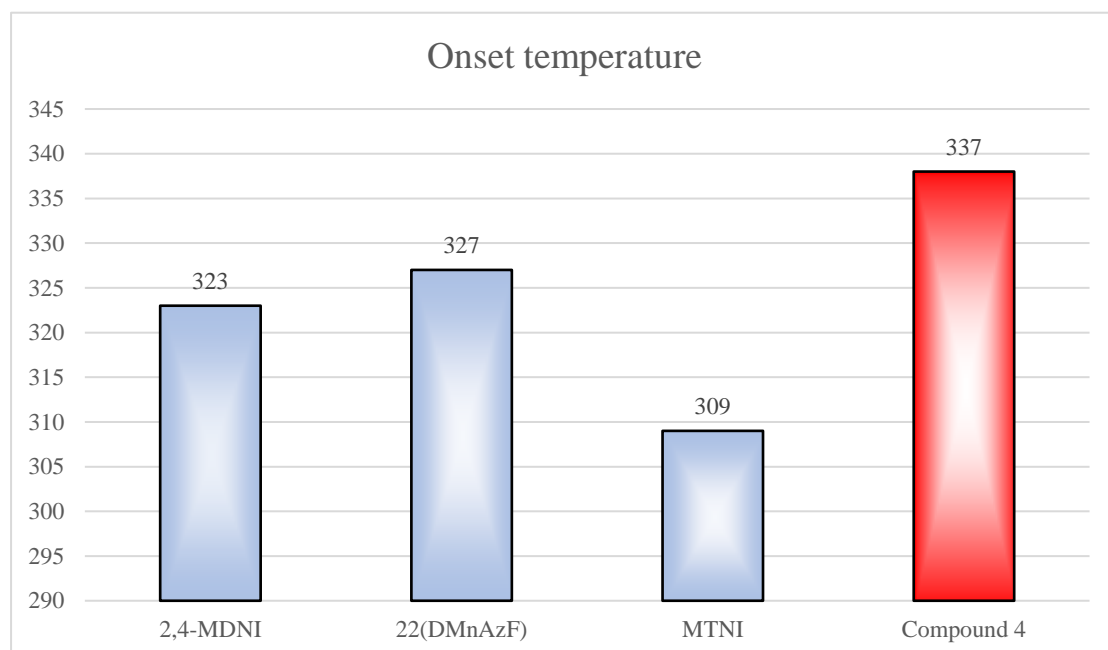

The compounds with decomposition temperatures of onset above 300 °C<sup>3-5</sup>

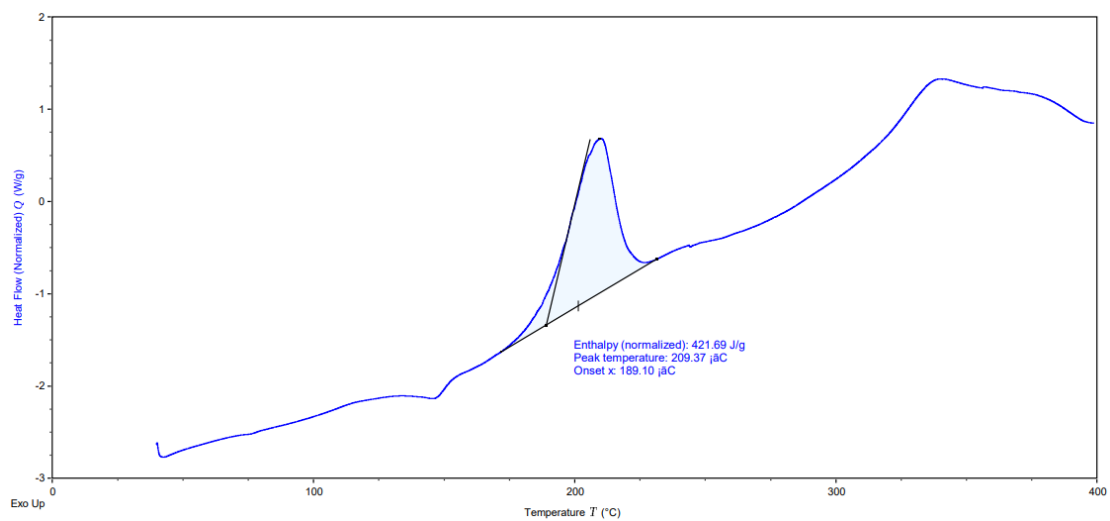

DSC curve of compound **5** at 5 °C min<sup>-1</sup>

## References

- 1 (a) A. D. Becke, *J. Chem. Phys.* 1993, **98**, 5648-5652; (b) P. J. Stephens, F. J. Devlin, C. F. Chabalowski and M. J. Frisch, *J. Phys. Chem.* 1994, **98**, 11623-11627.
- 2 M. S. Westwell, M. S. Searle, D. J. Wales and D. H. Williams, *J. Am. Chem. Soc.* 1995, **117**, 5013-5015.
- 3 X. Zhang, Y. Chi, M. Huang, J. Wang, *Chinese. J. Energ. Mater.*, 2012, **20**(6), 685-689.
- 4 J. Xu, Y. Yan, X. Li, F. Zheng, G. Guo, *Chem. Eng. J.* 2022, **429**, 132451.
- 5 Y. Yan, J. Xu, F. Wen, Y. Zhang, H. Bian, B. Li, N. Zhang, F. Zheng and G. Guo, *Inorg. Chem. Front.*, 2022, **9**, 5884-5892.
